# Supplementary material for: Bulked Segregant RNA-seq Reveals Differential Expression and SNPs of Candidate Genes Associated with Waterlogging Tolerance in Maize
Source: Front Plant Sci. 2017 Jun 14;8:1022. doi: 10.3389/fpls.2017.01022 (PMC5470080; doi:10.3389/fpls.2017.01022)
Supplement: TABLE S1 — Primers used in this study. [file Table_1.XLSX]

## Sheet: Sheet1
				Primers	Sequence (5´-3´)	Usage
				GRMZM2G164696 qF	AGGAGGGCGAGTACGAGGAC	qRT-PCR for GRMZM2G164696 gene
				GRMZM2G164696 qR	ACCCACGACAGATGATTACCG	qRT-PCR for GRMZM2G164696 gene
				GRMZM2G055704 qF	TTGGGTGGTGTTGGTGGTC	qRT-PCR for GRMZM2G055704 gene
				GRMZM2G055704 qR	CATCCGTTCGTTCATCTCGT	qRT-PCR for GRMZM2G055704 gene
				GRMZM2G319057 qF	ACTCTGCTAGTCCTCTTTTC	qRT-PCR for GRMZM2G319057 gene
				GRMZM2G319057 qR	TTTCTGATGTTCCACATCTC	qRT-PCR for GRMZM2G319057 gene
				GRMZM2G114055 qF	TCCCATTATTTGTTTGGTTTCG	qRT-PCR for GRMZM2G114055 gene
				GRMZM2G114055 qR	GACTTCATTCCCATCGTCCTG	qRT-PCR for GRMZM2G114055 gene
				GRMZM2G099860 qF	GCCACCTAACCAGAACCAAACA	qRT-PCR for GRMZM2G099860 gene
				GRMZM2G099860 qR	TCAAAGCGAGCAATGAAGCAA	qRT-PCR for GRMZM2G099860 gene
				GRMZM2G346861 qF	CTTCTCTTTGCTTCTTGCTCG	qRT-PCR for GRMZM2G346861 gene
				GRMZM2G346861 qR	GCTCTGCCTTCTCTGACTCTG	qRT-PCR for GRMZM2G346861 gene
				GRMZM2G082916 qF	AACAATCGCCGTATAAATGGA	qRT-PCR for GRMZM2G082916 gene
				GRMZM2G082916 qR	AAAGGGTAGGAGTCACAAGCA	qRT-PCR for GRMZM2G082916 gene
				GRMZM2G088765 qF	GGGGATGCCGTCGGAGAAGA	qRT-PCR for GRMZM2G088765 gene
				GRMZM2G088765 qR	TTGTCGGTGGGCTCTGGGAG	qRT-PCR for GRMZM2G088765 gene
				GRMZM2G179325 qF	TGGATAGCGGATAGGGAG	qRT-PCR for GRMZM2G179325 gene
				GRMZM2G179325 qR	TGGGCTTTCAATCACAACG	qRT-PCR for GRMZM2G179325 gene
				GRMZM2G038893 qF	CTAAGGAAGCAAGCAATCGA	qRT-PCR for GRMZM2G038893 gene
				GRMZM2G038893 qR	GCAAGAAGAGGAAGAGGAGG	qRT-PCR for GRMZM2G038893 gene
				GRMZM2G016521 qF	CCGTAGATTGCGTAGCGAAATAA	qRT-PCR for GRMZM2G016521 gene
				GRMZM2G016521 qR	GTGCAGAAACGATGGAGGAAAA	qRT-PCR for GRMZM2G016521 gene
				GRMZM2G057451 qF	AAGCAAAGCAAACCGAAGC	qRT-PCR for GRMZM2G057451 gene
				GRMZM2G057451 qR	AAATCGCTCAAGGCAGACC	qRT-PCR for GRMZM2G057451 gene
				GRMZM2G074404 qF	CGAGCCAGCGAACCAACTA	qRT-PCR for GRMZM2G074404 gene
				GRMZM2G074404 qR	GGCACAGCACGAGGAAAGG	qRT-PCR for GRMZM2G074404 gene
				GRMZM2G004459 qF	TCAGTTCGTTCTGGCTTCC	qRT-PCR for GRMZM2G004459 gene
				GRMZM2G004459 qR	CTAACCTGCTGTTCGTCCC	qRT-PCR for GRMZM2G004459 gene
				GRMZM2G055802 qF	CAAAGCGGTCAGGAAGTGG	qRT-PCR for GRMZM2G055802 gene
				GRMZM2G055802 qR	AGCGGTTCAGAGGTTGAGTTT	qRT-PCR for GRMZM2G055802 gene
				GRMZM2G176612 qF	CTGTCGCATCTGAGGCTTCCA	qRT-PCR for GRMZM2G176612 gene
				GRMZM2G176612 qR	AACCCATTACCCATCCCATAC	qRT-PCR for GRMZM2G176612 gene
				AC187157.4 qF	CACTGTTACGTGCGGGAGCG	qRT-PCR for AC187157.4 gene
				AC187157.4 qR	GAAGGTGCCCAGCCAGATGC	qRT-PCR for AC187157.4 gene
				GRMZM2G159344 qF	TAGGTATTGCCTTGCCGTGTC	qRT-PCR for GRMZM2G159344 gene
				GRMZM2G159344 qR	CTGCATAATGGCCCTTTGTTT	qRT-PCR for GRMZM2G159344 gene
				GLK11 qF	CTGCGGCTGATGGGAATGA	qRT-PCR for GLK11 gene
				GLK11 qR	GCGTCCAAACCCGTGTCTT	qRT-PCR for GLK11 gene
				GRMZM2G132185 qF	CAGCGACAGCACCACCTT	qRT-PCR for GRMZM2G132185 gene
				GRMZM2G132185 qR	CGGCCAGTTCAGATCCAG	qRT-PCR for GRMZM2G132185 gene
				GRMZM2G148772 qF	ATCCGCTATGCGTCCCG	qRT-PCR for GRMZM2G148772 gene
				GRMZM2G148772 qR	GGCATGTGATCGCCAACTAG	qRT-PCR for GRMZM2G148772 gene
				GRMZM2G086573 qF	CGGTCGCTTTCAATGGGTC	qRT-PCR for GRMZM2G086573 gene
				GRMZM2G086573 qR	CACTACTCGCTGCTTACTGTCTC	qRT-PCR for GRMZM2G086573 gene
				GRMZM2G022958 qF	ATGAACATGCCATTCCTCACTC	qRT-PCR for GRMZM2G022958 gene
				GRMZM2G022958 qR	CCTCCGAGCAGTAGTCCACCT	qRT-PCR for GRMZM2G022958 gene
				GRMZM2G428554 qF	CACTGGAATCGTTGGCACTA	qRT-PCR for GRMZM2G428554 gene
				GRMZM2G428554 qR	ACCGACAGGACCTTACGC	qRT-PCR for GRMZM2G428554 gene
				Maize-Actin1 qF	TGTTGCTATCCAGGCTGTTCT	qRT-PCR for Actin1 gene
				Maize-Actin1 qR	TCATTAGGTGGTCGGTGAGGT	qRT-PCR for Actin1 gene
