# Supplementary material for: Bulked Segregant RNA-seq Reveals Differential Expression and SNPs of Candidate Genes Associated with Waterlogging Tolerance in Maize
Source: Front Plant Sci. 2017 Jun 14;8:1022. doi: 10.3389/fpls.2017.01022 (PMC5470080; doi:10.3389/fpls.2017.01022)
Supplement: TABLE S6 — A total of 165 SNPs with high probabilities (>0.9) between the tolerant and sensitive pools under normal condition. [file Table_6.XLS]

## Sheet: Sheet1
		SNPID	Gene ID	Chr	Location	ref	alt-SNP	Sensitive pools-ref-reads	Sensitive pools-alt-reads	Tolerant pools-ref-reads	Tolerant pools-alt-reads	Probability Sensitive pools	Probability Tolerant pools
		chr1_S2038317	GRMZM2G164696	chr1	2038317	T	G	210	168	0	113	0.958	0.964
		chr1_S2858989	GRMZM2G006673	chr1	2858989	T	C	12	40	137	0	0.968	0.975
		chr1_S3564416	GRMZM2G062210	chr1	3564416	G	A	91	10	0	82	0.933	0.975
		chr1_S4445994	GRMZM2G136859	chr1	4445994	T	G	185	507	522	0	0.986	0.975
		chr1_S5531718	GRMZM2G055704	chr1	5531718	C	G	134	45	0	90	0.942	0.975
		chr1_S8619775	GRMZM2G171181	chr1	8619775	T	C	10	68	89	0	0.941	0.975
		chr1_S9435276	GRMZM2G107532	chr1	9435276	T	C	41	80	128	0	0.965	0.975
		chr1_S16587350	GRMZM2G319057	chr1	16587350	T	C	14	75	119	0	0.961	0.975
		chr1_S16587393	GRMZM2G319057	chr1	16587393	G	T	23	81	124	0	0.963	0.975
		chr1_S21759082	GRMZM2G114055	chr1	21759082	C	G	21	67	92	0	0.944	0.975
		chr1_S21759107	GRMZM2G114055	chr1	21759107	T	G	19	66	98	0	0.949	0.975
		chr1_S24051871	GRMZM2G013430	chr1	24051871	A	C	81	127	110	0	0.957	0.974
		chr1_S26150790	GRMZM2G009638	chr1	26150790	T	C	89	183	272	0	0.982	0.975
		chr1_S28449533	GRMZM2G099860	chr1	28449533	C	G	59	120	146	0	0.97	0.975
		chr1_S31747010	GRMZM2G060952	chr1	31747010	C	A	35	65	173	0	0.975	0.973
		chr1_S33216647	GRMZM2G346861	chr1	33216647	A	G	70	127	169	0	0.974	0.975
		chr1_S35936860	GRMZM2G174589	chr1	35936860	T	C	93	19	0	76	0.924	0.975
		chr1_S40727204	GRMZM2G160906	chr1	40727204	T	C	206	166	0	354	0.984	0.962
		chr1_S41278061	GRMZM2G048482	chr1	41278061	A	AC	202	40	0	134	0.967	0.975
		chr1_S46062432	GRMZM2G058138	chr1	46062432	G	A	173	119	0	201	0.978	0.974
		chr1_S46119761	GRMZM2G032182	chr1	46119761	A	C	68	40	0	90	0.942	0.971
		chr1_S46543103	GRMZM2G104373	chr1	46543103	G	A	112	168	361	0	0.984	0.975
		chr1_S49288534	GRMZM2G030036	chr1	49288534	A	G	66	14	0	153	0.972	0.975
		chr1_S58059152	GRMZM2G042074	chr1	58059152	T	C	45	80	108	0	0.955	0.974
		chr1_S59577182	GRMZM2G052034	chr1	59577182	T	C	10	25	100	0	0.95	0.964
		chr1_S64718455	GRMZM2G001288	chr1	64718455	C	G	32	54	95	0	0.946	0.965
		chr1_S72009964	GRMZM2G313009	chr1	72009964	A	C	169	103	0	220	0.98	0.975
		chr1_S83403975	GRMZM2G099467	chr1	83403975	T	C	80	38	0	174	0.975	0.975
		chr1_S84764296	GRMZM2G119766	chr1	84764296	A	C	42	2	0	80	0.93	0.975
		chr1_S84764316	GRMZM2G119766	chr1	84764316	T	C	46	8	0	94	0.945	0.975
		chr1_S91769865	GRMZM2G082916	chr1	91769865	C	T	43	91	80	0	0.93	0.975
		chr1_S91772738	GRMZM2G082916	chr1	91772738	G	A	42	65	101	0	0.951	0.962
		chr1_S94880470	GRMZM2G481163	chr1	94880470	A	C	91	42	0	97	0.948	0.975
		chr1_S102583560	GRMZM2G090500	chr1	102583560	T	C	28	63	101	0	0.951	0.975
		chr1_S102584050	GRMZM2G090500	chr1	102584050	G	A	142	173	264	0	0.982	0.947
		chr1_S107792331	GRMZM2G304897	chr1	107792331	A	G	16	28	149	0	0.971	0.93
		chr1_S110492130	GRMZM2G088765	chr1	110492130	G	A	18	81	107	0	0.955	0.975
		chr1_S110492211	GRMZM2G088765	chr1	110492211	C	G	21	95	137	0	0.968	0.975
		chr1_S110493035	GRMZM2G088765	chr1	110493035	T	C	8	65	90	0	0.942	0.975
		chr1_S155677204	GRMZM2G179325	chr1	155677204	G	C	46	74	126	0	0.964	0.97
		chr1_S166805745	GRMZM2G038893	chr1	166805745	G	A	167	45	0	103	0.952	0.975
		chr1_S166805748	GRMZM2G038893	chr1	166805748	C	T	168	46	0	103	0.952	0.975
		chr1_S174317159	GRMZM2G088565	chr1	174317159	C	T	199	242	342	0	0.984	0.961
		chr1_S176843521	GRMZM2G149751	chr1	176843521	C	T	123	164	456	0	0.986	0.969
		chr1_S176843521	GRMZM2G449274	chr1	176843521	C	T	123	164	456	0	0.986	0.969
		chr1_S201633610	GRMZM2G318794	chr1	201633610	G	A	13	31	80	0	0.93	0.969
		chr1_S205532690	GRMZM2G149414	chr1	205532690	A	G	427	264	0	637	0.987	0.975
		chr1_S209988990	GRMZM2G016521	chr1	209988990	T	C	148	94	0	163	0.973	0.975
		chr1_S217451977	GRMZM5G844703	chr1	217451977	T	C	130	82	0	80	0.93	0.974
		chr1_S227783199	GRMZM2G087651	chr1	227783199	G	T	137	48	0	78	0.927	0.975
		chr1_S227783205	GRMZM2G087651	chr1	227783205	T	A	145	55	0	78	0.927	0.975
		chr1_S228151671	GRMZM2G057451	chr1	228151671	C	A	112	32	0	107	0.955	0.975
		chr1_S228151744	GRMZM2G057451	chr1	228151744	C	T	128	37	0	114	0.959	0.975
		chr1_S228644152	GRMZM2G153208	chr1	228644152	A	C	57	39	0	115	0.959	0.944
		chr1_S231279283	GRMZM2G147346	chr1	231279283	G	C	165	206	316	0	0.983	0.964
		chr1_S235455980	GRMZM2G389570	chr1	235455980	G	A	26	43	106	0	0.954	0.952
		chr1_S240866326	GRMZM2G124434	chr1	240866326	T	A	143	188	452	0	0.986	0.97
		chr1_S253796459	GRMZM2G043127	chr1	253796459	C	G	17	55	137	0	0.968	0.975
		chr1_S257807477	GRMZM2G154890	chr1	257807477	T	C	38	16	0	92	0.944	0.972
		chr1_S258554820	GRMZM2G108766	chr1	258554820	A	G	317	184	0	367	0.985	0.975
		chr1_S271111596	GRMZM2G153292	chr1	271111596	C	T	256	346	149	0	0.971	0.975
		chr1_S278902052	GRMZM2G154870	chr1	278902052	T	A	4	28	157	0	0.972	0.975
		chr1_S279912817	GRMZM2G400714	chr1	279912817	A	G	90	57	0	135	0.967	0.972
		chr1_S287706148	GRMZM2G074404	chr1	287706148	A	G	125	60	0	166	0.974	0.975
		chr1_S291796899	GRMZM2G004459	chr1	291796899	A	G	128	155	178	0	0.976	0.936
		chr1_S293997666	GRMZM2G055802	chr1	293997666	A	G	70	10	0	111	0.957	0.975
		chr1_S299129454	GRMZM2G176612	chr1	299129454	T	C	106	74	0	182	0.976	0.968
		chr1_S299193259	GRMZM2G115456	chr1	299193259	A	G	42	1	0	77	0.926	0.975
		chr1_S299193323	GRMZM2G115456	chr1	299193323	C	G	51	11	0	89	0.941	0.975
		chr1_S299197076	GRMZM2G115456	chr1	299197076	C	T	116	78	0	121	0.962	0.972
		chr1_S300430426	GRMZM2G077596	chr1	300430426	C	A	103	62	0	145	0.97	0.974
		chr10_S9538030	GRMZM2G028432	chr10	9538030	C	A	15	32	59	0	0.947	0.956
		chr10_S12753325	GRMZM2G063394	chr10	12753325	C	T	38	19	0	60	0.948	0.958
		chr10_S13785006	GRMZM2G006042	chr10	13785006	A	G	63	23	0	58	0.945	0.967
		chr10_S55756027	GRMZM2G127087	chr10	55756027	G	T	150	110	0	423	1	0.962
		chr10_S60143179	GRMZM2G079777	chr10	60143179	C	T	87	30	0	60	0.948	0.967
		chr10_S60143608	GRMZM2G079777	chr10	60143608	C	T	78	43	0	63	0.953	0.966
		chr10_S60143650	GRMZM2G079777	chr10	60143650	T	A	101	75	0	97	0.979	0.949
		chr10_S60143686	GRMZM2G079777	chr10	60143686	C	G	88	60	0	74	0.965	0.958
		chr10_S63234428	GRMZM2G002391	chr10	63234428	TAC	T	54	78	135	0	0.989	0.952
		chr10_S76174603	GRMZM2G007698	chr10	76174603	T	C	42	70	81	0	0.97	0.963
		chr10_S76637100	GRMZM2G042992	chr10	76637100	C	G	260	74	0	377	0.999	0.967
		chr10_S76637108	GRMZM2G042992	chr10	76637108	A	G	263	76	0	380	1	0.967
		chr10_S83447355	GRMZM2G003897	chr10	83447355	A	G	45	14	0	55	0.939	0.966
		chr10_S88682122	GRMZM2G089484	chr10	88682122	T	C	71	51	0	105	0.982	0.939
		chr10_S92133832	GRMZM2G176998	chr10	92133832	C	A	7	34	61	0	0.95	0.967
		chr10_S92133853	GRMZM2G176998	chr10	92133853	C	G	6	46	65	0	0.955	0.967
		chr10_S108468029	AC231747.1_FG001	chr10	108468029	T	G	66	34	0	77	0.967	0.966
		chr10_S116057517	GRMZM2G052100	chr10	116057517	G	C	15	278	1054	0	1	0.967
		chr10_S120671982	GRMZM2G079490	chr10	120671982	G	C	71	28	0	87	0.974	0.967
		chr10_S134032889	GRMZM2G126665	chr10	134032889	C	A	45	114	238	0	0.997	0.967
		chr10_S134053948	GRMZM2G427097	chr10	134053948	C	T	4	28	175	0	0.994	0.967
		chr10_S142070515	GRMZM2G019325	chr10	142070515	G	T	12	51	92	0	0.977	0.967
		chr10_S144451491	GRMZM2G143071	chr10	144451491	C	T	15	42	75	0	0.966	0.966
		chr10_S144457291	GRMZM2G143071	chr10	144457291	T	C	28	49	144	0	0.991	0.957
		chr10_S144457382	GRMZM2G143071	chr10	144457382	A	G	66	99	323	0	0.999	0.963
		chr10_S144457456	GRMZM2G143071	chr10	144457456	G	C	41	57	209	0	0.996	0.922
		chr10_S144915861	GRMZM2G085236	chr10	144915861	A	G	64	100	132	0	0.989	0.965
		chr10_S144916074	GRMZM2G085236	chr10	144916074	G	A	87	181	144	0	0.991	0.967
		chr10_S145196044	GRMZM2G086030	chr10	145196044	C	T	105	6	0	53	0.935	0.967
		chr10_S148833207	GRMZM2G406119	chr10	148833207	C	CAG	24	45	67	0	0.958	0.959
		chr2_S3230519	GRMZM2G018692	chr2	3230519	G	C	67	22	0	207	0.943	0.973
		chr2_S8814987	GRMZM2G302712	chr2	8814987	T	C	1	53	218	0	0.946	0.973
		chr2_S9358492	GRMZM2G165060	chr2	9358492	T	C	242	466	557	0	0.968	0.973
		chr2_S16638738	GRMZM2G080992	chr2	16638738	T	C	90	119	635	0	0.969	0.956
		chr2_S31644715	GRMZM2G083253	chr2	31644715	T	G	1	99	194	0	0.941	0.973
		chr2_S31644762	GRMZM2G083253	chr2	31644762	AT	A	2	143	267	0	0.953	0.973
		chr2_S31644807	GRMZM2G083253	chr2	31644807	T	G	2	84	211	0	0.944	0.973
		chr2_S33838541	GRMZM2G057113	chr2	33838541	G	T	35	104	202	0	0.942	0.973
		chr2_S44040256	GRMZM2G703021	chr2	44040256	G	A	7	33	151	0	0.927	0.973
		chr2_S74044937	GRMZM2G026793	chr2	74044937	C	A	47	86	193	0	0.94	0.972
		chr2_S185381641	GRMZM2G134430	chr2	185381641	G	A	140	179	314	0	0.958	0.963
		chr2_S185381656	GRMZM2G134430	chr2	185381656	C	A	198	157	0	374	0.962	0.963
		chr2_S187379936	GRMZM2G076075	chr2	187379936	G	A	109	164	242	0	0.95	0.972
		chr2_S193506723	GRMZM2G150503	chr2	193506723	T	C	117	75	0	236	0.949	0.972
		chr2_S212852859	GRMZM2G044049	chr2	212852859	G	A	173	252	266	0	0.953	0.973
		chr2_S233911754	GRMZM5G822237	chr2	233911754	C	T	285	41	0	696	0.97	0.973
		chr2_S233911757	GRMZM5G822237	chr2	233911757	G	T	286	39	0	688	0.97	0.973
		chr5_S5891932	GRMZM2G033267	chr5	5891932	C	A	93	123	197	0	0.939	0.967
		chr5_S5891932	GRMZM2G336888	chr5	5891932	C	A	93	123	197	0	0.939	0.967
		chr5_S6436550	GRMZM2G377904	chr5	6436550	G	C	18	81	186	0	0.936	0.982
		chr5_S9618305	GRMZM2G082343	chr5	9618305	G	C	12	92	181	0	0.935	0.982
		chr5_S10224866	GRMZM2G152328	chr5	10224866	C	G	77	154	156	0	0.926	0.982
		chr5_S12275283	GRMZM2G102760	chr5	12275283	C	G	24	7	0	156	0.926	0.978
		chr5_S19055458	GRMZM2G375984	chr5	19055458	A	G	230	167	0	171	0.932	0.981
		chr5_S33290072	GRMZM2G012030	chr5	33290072	C	A	55	166	188	0	0.936	0.982
		chr5_S65419140	GRMZM2G112805	chr5	65419140	T	C	543	291	0	510	0.958	0.982
		chr5_S80831892	GRMZM2G425774	chr5	80831892	T	G	139	197	427	0	0.957	0.981
		chr5_S167938504	GRMZM2G172230	chr5	167938504	G	C	151	273	196	0	0.938	0.982
		chr5_S170023744	GRMZM2G017991	chr5	170023744	A	C	151	205	364	0	0.955	0.98
		chr5_S174307196	GRMZM2G113409	chr5	174307196	G	A	304	220	0	352	0.954	0.981
		chr5_S180039436	GRMZM2G025832	chr5	180039436	C	A	164	87	0	147	0.923	0.982
		chr5_S189974096	GRMZM2G140669	chr5	189974096	A	G	88	44	0	143	0.921	0.981
		chr5_S195189806	GRMZM2G154628	chr5	195189806	G	A	85	7	0	149	0.923	0.982
		chr5_S195678069	GRMZM2G434203	chr5	195678069	G	T	196	239	1111	0	0.96	0.969
		chr5_S204822548	GRMZM2G375116	chr5	204822548	G	A	127	86	0	170	0.931	0.98
		chr5_S205562811	GRMZM2G151257	chr5	205562811	G	T	17	74	437	0	0.957	0.982
		chr5_S213267650	GRMZM2G318662	chr5	213267650	T	C	7	26	138	0	0.918	0.98
		chr5_S214374497	GRMZM2G096690	chr5	214374497	C	G	151	228	368	0	0.955	0.981
		chr5_S214374497	GRMZM2G096815	chr5	214374497	C	G	151	228	368	0	0.955	0.981
		chr8_S503627	GRMZM5G825978	chr8	503627	C	T	10	194	462	0	0.962	0.976
		chr8_S503627	GRMZM5G833066	chr8	503627	C	T	10	194	462	0	0.962	0.976
		chr8_S503768	GRMZM5G825978	chr8	503768	G	A	5	193	574	0	0.963	0.976
		chr8_S503768	GRMZM5G833066	chr8	503768	G	A	5	193	574	0	0.963	0.976
		chr8_S503782	GRMZM5G825978	chr8	503782	A	G	5	184	551	0	0.963	0.976
		chr8_S503782	GRMZM5G833066	chr8	503782	A	G	5	184	551	0	0.963	0.976
		chr8_S9901457	GRMZM2G069195	chr8	9901457	G	A	160	219	349	0	0.962	0.975
		chr8_S22678572	AC187157.4_FG002	chr8	22678572	C	T	21	48	85	0	0.925	0.975
		chr8_S28524257	GRMZM2G018228	chr8	28524257	A	G	316	73	0	190	0.957	0.976
		chr8_S28524267	GRMZM2G018228	chr8	28524267	G	A	340	76	0	202	0.958	0.976
		chr8_S37807702	GRMZM2G061088	chr8	37807702	T	C	136	111	0	411	0.962	0.936
		chr8_S90425875	GRMZM2G159344	chr8	90425875	T	G	53	13	0	99	0.936	0.976
		chr8_S90425905	GRMZM2G159344	chr8	90425905	T	C	19	39	97	0	0.935	0.969
		chr8_S112902223	GRMZM2G080851	chr8	112902223	G	T	100	163	395	0	0.962	0.976
		chr8_S145608132	GRMZM2G102318	chr8	145608132	T	C	59	92	152	0	0.952	0.973
		chr8_S160390604	GRMZM2G134256	chr8	160390604	G	C	44	0	0	148	0.952	0.976
		chr8_S163031493	GRMZM2G476762	chr8	163031493	A	G	255	115	0	109	0.941	0.976
		chr8_S163031944	GRMZM2G476762	chr8	163031944	G	A	272	98	0	89	0.929	0.976
		chr8_S165239456	GRMZM2G002023	chr8	165239456	C	T	22	83	107	0	0.94	0.976
		chr8_S168492299	GRMZM2G165177	chr8	168492299	C	G	137	76	0	130	0.948	0.976
		chr8_S170963973	GRMZM2G076152	chr8	170963973	C	A	27	65	111	0	0.942	0.976
		chr8_S171598125	GRMZM2G438299	chr8	171598125	T	C	22	51	140	0	0.95	0.975
		chr8_S171598528	GRMZM2G438299	chr8	171598528	G	A	16	35	165	0	0.954	0.969
		chr8_S172671913	GRMZM2G079257	chr8	172671913	C	T	95	210	343	0	0.962	0.976
		chr8_S173891103	GRMZM2G180021	chr8	173891103	G	T	162	15	0	140	0.95	0.976
